# Supplementary material for: Changes in Buprenorphine Treatment After Medicaid Expansion
Source: Atypon-hosted journal article supplement (doi:10.1176/appi.ps.202000491), 2021-03-18
Supplement: appi.ps.202000491.ds001.pdf [file appi.ps.202000491.ds001.pdf]

## Supplement Table 1. ACA expansion and non-expansion states

### **Main Analysis**

Expansion States: AZ, AR, CA, CO, CT, DE, HI, IL, IA, KY, MD, MA, MI, MN, NH, NV, NJ, NM, NY, ND, OH, OR, RI, VT, WA, WV, DC

Non-Expansion States: AL, AK, FL, GA, IN, ID, KS, LA, ME, MS, MO, MT, NE, NC, OK, PA, SC, SD, TN, TX, UT, VA, WI, WY

### **Sensitivity Analysis**

Expansion States: AZ, AR, CO, DE, HI, IL, IA, KY, MD, MA, MI, NH, NV, NM, NY, ND, OH, OR, RI, VT, WV

Non-Expansion States: AL, FL, GA, ID, KS, ME, MS, MO, NE, NC, OK, SC, SD, TN, TX, UT, VA, WI, WY

Source: Henry J. Kaiser Family Foundation. Status of state action on the Medicaid expansion decision [Internet]. San Francisco (CA): Available from: <https://www.kff.org/health-reform/state-indicator/state-activity-around-expanding-medicaid-under-the-affordable-care-act>

Supplement Table 2. Relative change in number of Medicaid patients treated with buprenorphine in Medicaid expansion and non-expansion states before and after expansion

|                                  | Medicaid Expansion States                                                              |                   |                      | Medicaid Non-Expansion States                                                          |                     |                     |                                       |
|----------------------------------|----------------------------------------------------------------------------------------|-------------------|----------------------|----------------------------------------------------------------------------------------|---------------------|---------------------|---------------------------------------|
|                                  | Slope in quarterly number of patients treated with buprenorphine in thousands (95% CI) |                   |                      | Slope in quarterly number of patients treated with buprenorphine in thousands (95% CI) |                     |                     |                                       |
| Groups                           | Pre-Expansion                                                                          | Post-Expansion    | Change               | Pre-Expansion                                                                          | Post-Expansion      | Change              | Difference-in-Differences<br><i>P</i> |
|                                  | (2012-2013)                                                                            | (2014-2018)       |                      | (2012-2013)                                                                            | (2014-2018)         |                     |                                       |
| Total                            | -0.39 (-1.52, 0.74)                                                                    | 2.75 (2.31, 3.19) | 59.83 (32.09, 87.58) | -0.26 (-0.81, 0.30)                                                                    | 0.64 (0.36, 0.91)   | 16.73 (3.09, 30.36) | <.001                                 |
| Men                              | -0.17 (-0.07, 0.40)                                                                    | 1.51 (1.30, 1.71) | 32.11 (18.27, 45.94) | -0.14 (-0.34, 0.07)                                                                    | 0.26 (0.16, 0.37)   | 7.45 (2.40, 12.50)  | <.001                                 |
| Women                            | -0.21 (-0.79, 0.37)                                                                    | 1.24 (1.00, 1.48) | 27.52 (13.26, 41.79) | -0.12 (-0.48, 0.23)                                                                    | 0.37 (0.20, 0.54)   | 9.25 (0.47, 18.02)  | <.001                                 |
| Age, years                       |                                                                                        |                   |                      |                                                                                        |                     |                     |                                       |
| 16-25                            | -0.05 (-0.15, 0.05)                                                                    | 0.06 (0.03, 0.09) | 2.27 (-0.11, 4.65)   | -0.04 (-0.13, 0.05)                                                                    | -0.02 (-0.05, 0.00) | 0.11 (-2.04, 2.27)  | <.001                                 |
| 25-34                            | -0.14 (-0.57, 0.29)                                                                    | 1.07 (0.90, 1.23) | 23.09 (12.63, 33.54) | -0.16 (-0.41, 0.08)                                                                    | 0.19 (0.09, 0.30)   | 6.59 (0.59, 12.60)  | <.001                                 |
| 35-44                            | -0.18 (-0.68, 0.32)                                                                    | 0.89 (0.69, 1.09) | 20.60 (8.34, 32.86)  | -0.06 (-0.27, 0.16)                                                                    | 0.24 (0.15, 0.33)   | 6.02 (0.74, 11.30)  | <.001                                 |
| 45-54                            | -0.05 (-0.22, 0.13)                                                                    | 0.44 (0.39, 0.49) | 9.15 (4.98, 13.33)   | -0.02 (-0.11, 0.06)                                                                    | 0.11 (0.07, 0.15)   | 2.58 (0.50, 4.66)   | <.001                                 |
| 55-80                            | 0.00 (-0.11, 0.11)                                                                     | 0.27 (0.24, 0.30) | 5.12 (2.45, 7.80)    | 0.00 (-0.06, 0.05)                                                                     | 0.08 (0.05, 0.11)   | 1.62 (-0.20, 3.04)  | <.001                                 |
| Data source 2012-2018 IQVIA LRx. |                                                                                        |                   |                      |                                                                                        |                     |                     |                                       |

Supplement Figure 1: Mean quarterly percentage of buprenorphine prescriptions paid for by Medicaid in expansion and non-expansion states, 2012-18

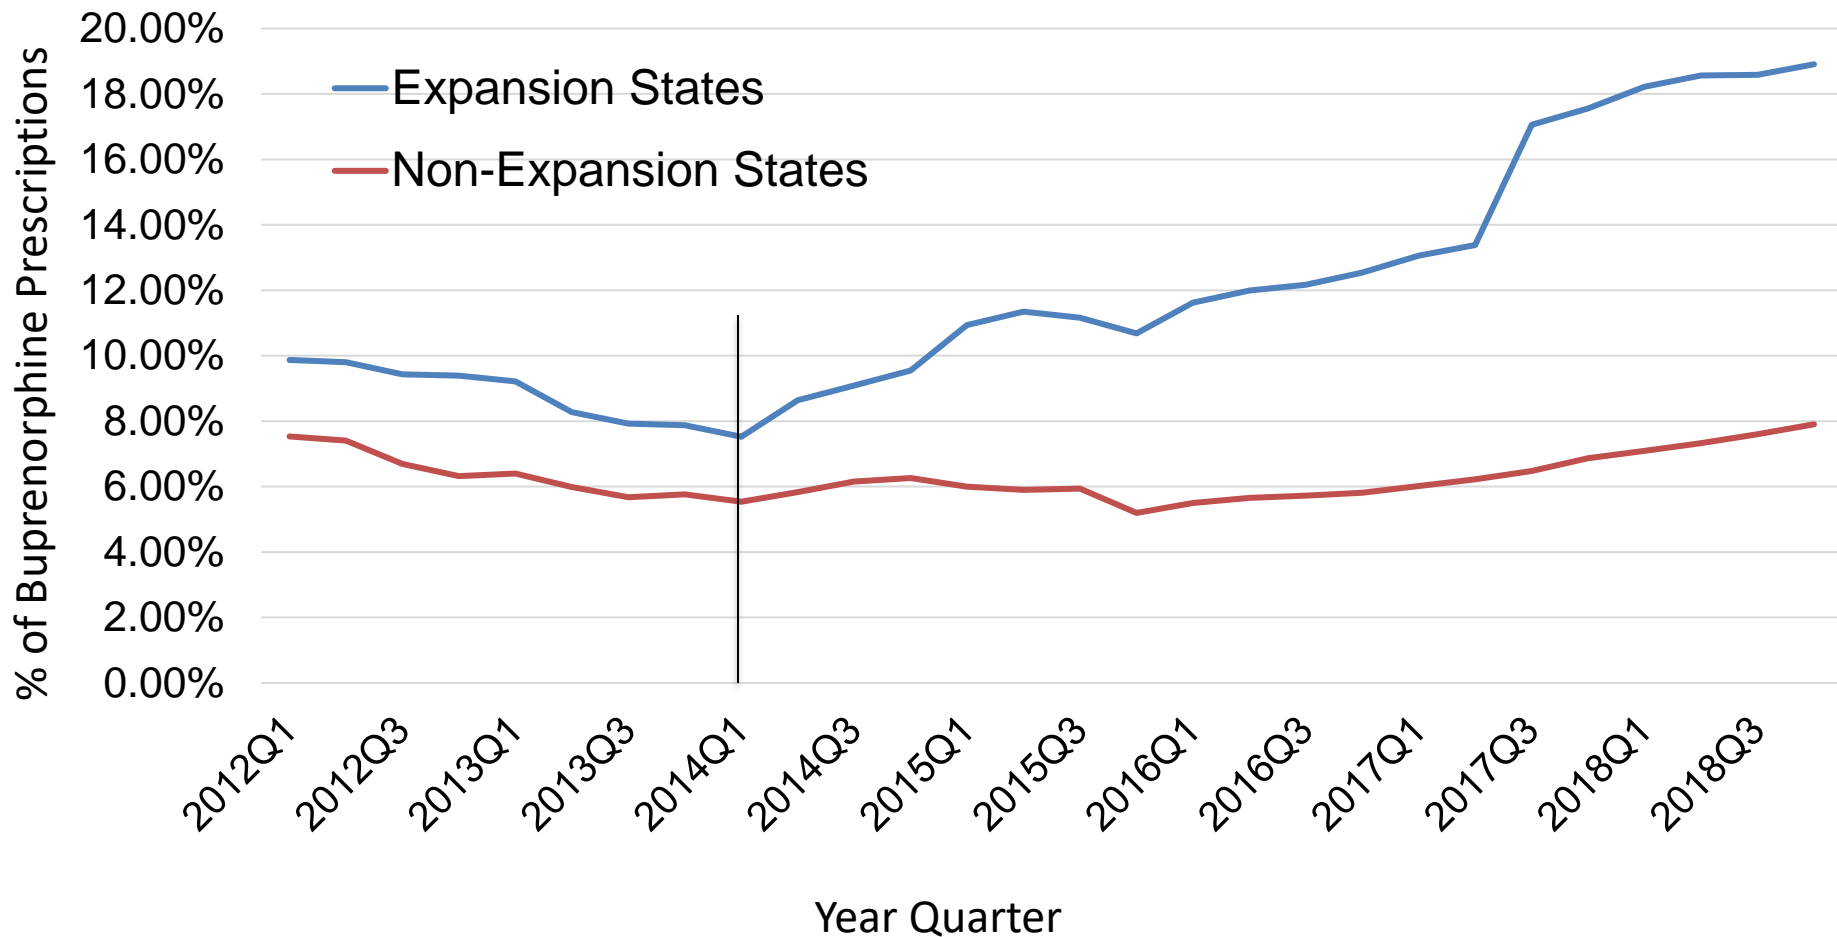

Data Source: 2012-2018 IQVIA LRx. Vertical line denotes enactment of Medicaid expansion.

Supplement Figure 2. Mean quarterly number of Medicaid financed patients in thousands treated with buprenorphine in expansion states by age group, 2012-18

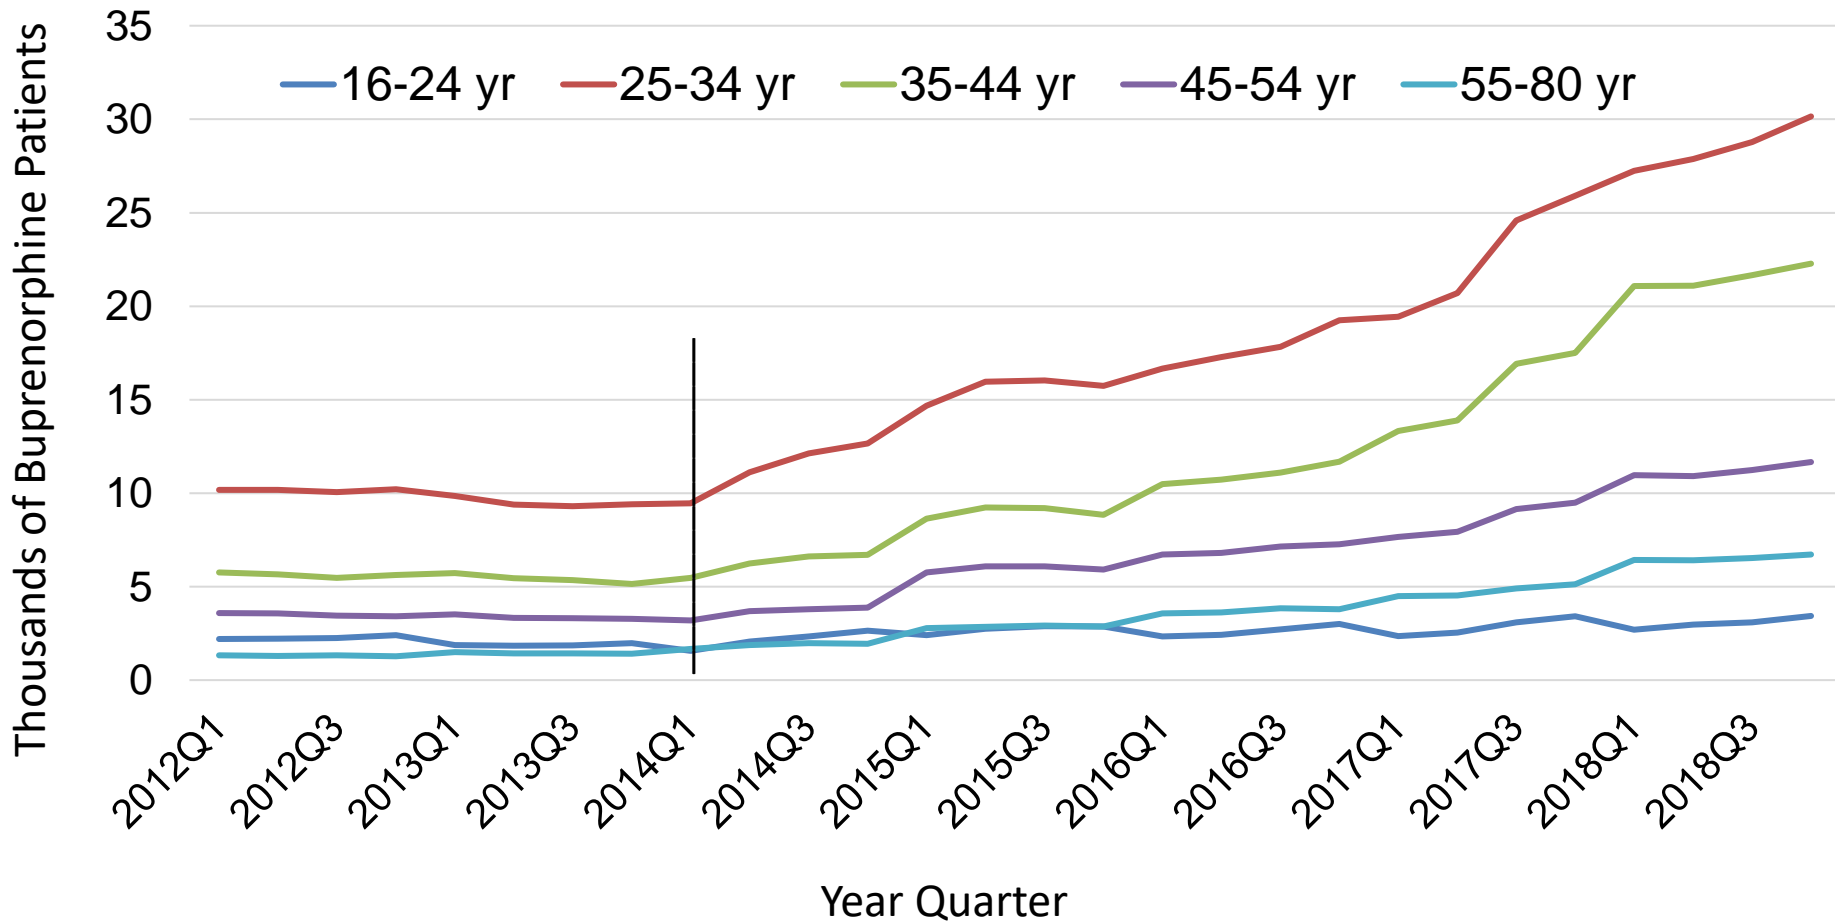

Data Source: 2012-2018 IQVIA LRx . Vertical line denotes enactment of Medicaid expansion.

Supplement Figure 3: Mean quarterly number of Medicaid financed patients in thousands treated with buprenorphine in non-expansion states by age group, 2012-18

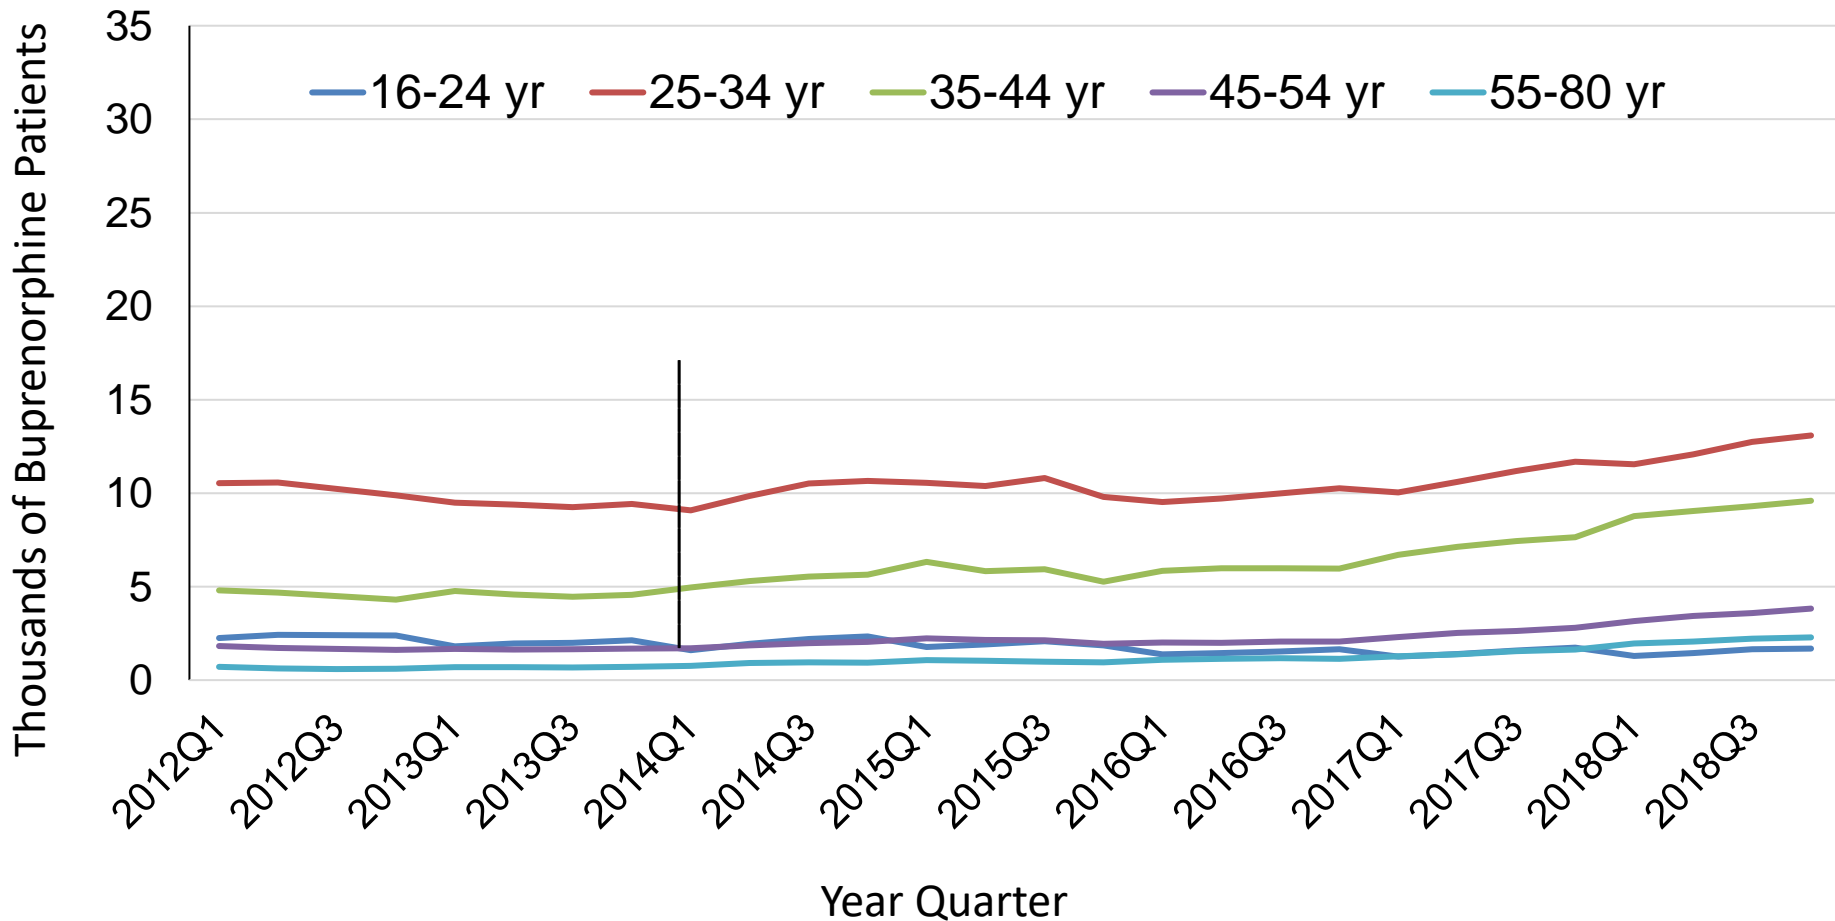

Data Source: 2012-2018 IQVIA LRx. Vertical line denotes enactment of Medicaid expansion.

Supplement Figure 4: Total mean quarterly number of privately insured patients in thousands treated with buprenorphine in expansion and non-expansion states, 2012-18

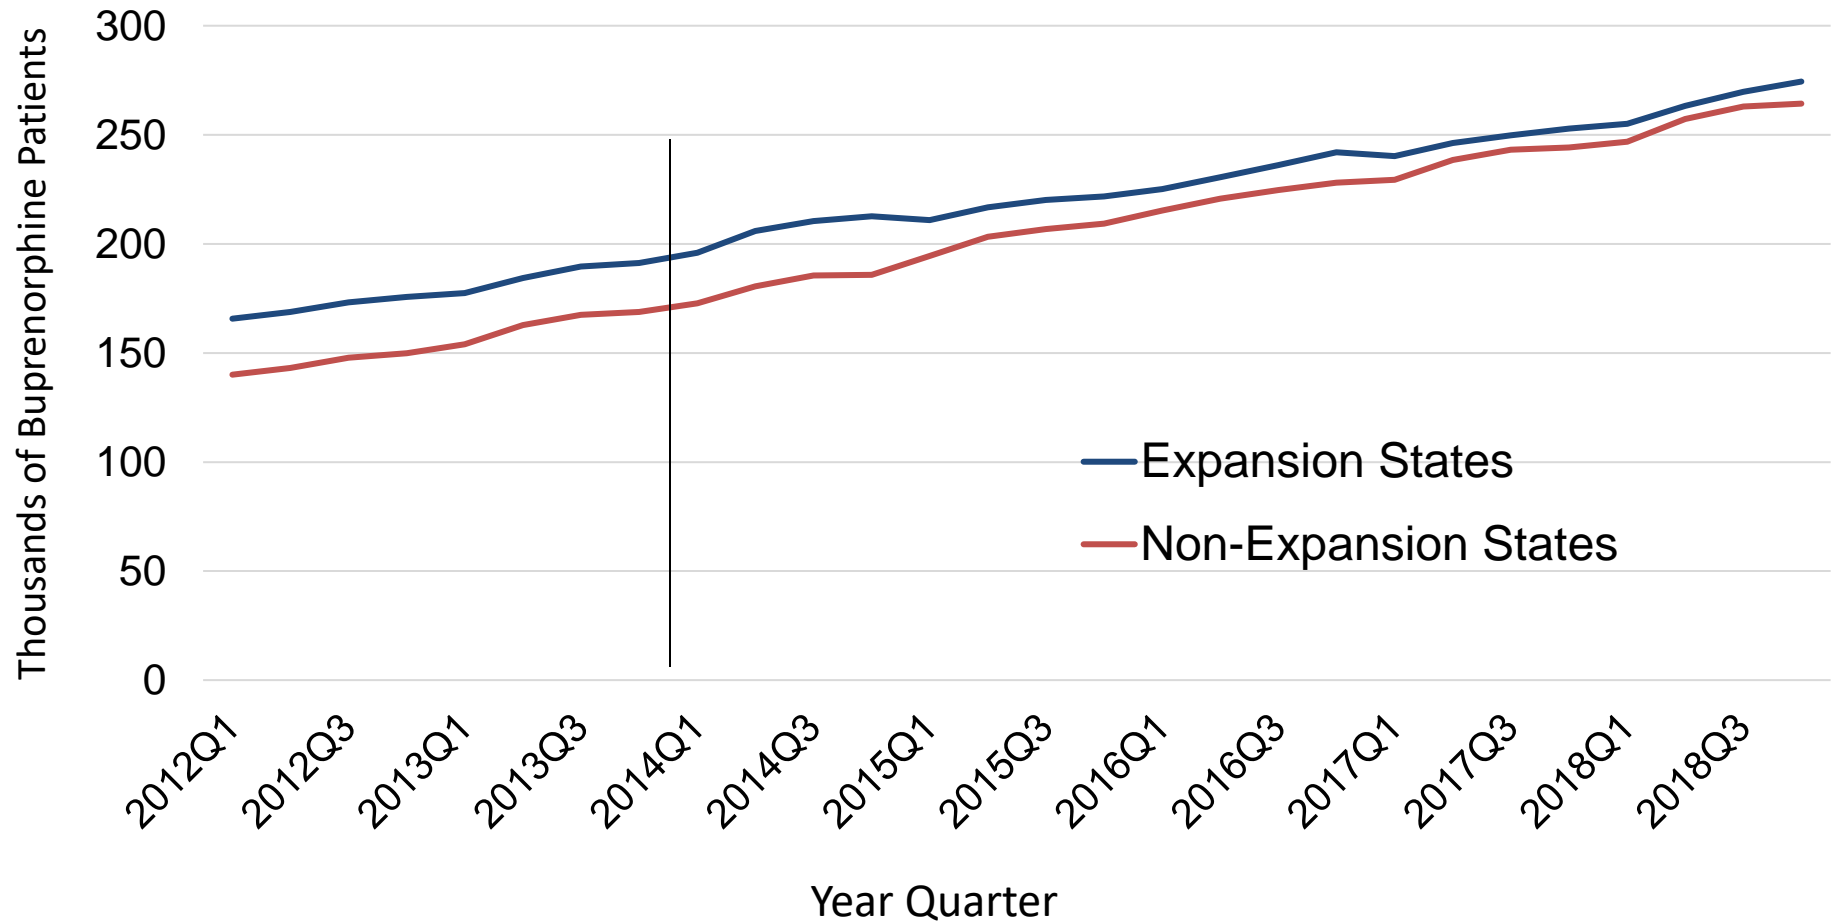

Data source: 2012-2018 IQVIA LRx. Vertical line denotes enactment of Medicaid expansion.

Supplement Figure 5: Total mean quarterly number of other publicly insured\* patients in thousands treated with buprenorphine in expansion and non-expansion states, 2012-18

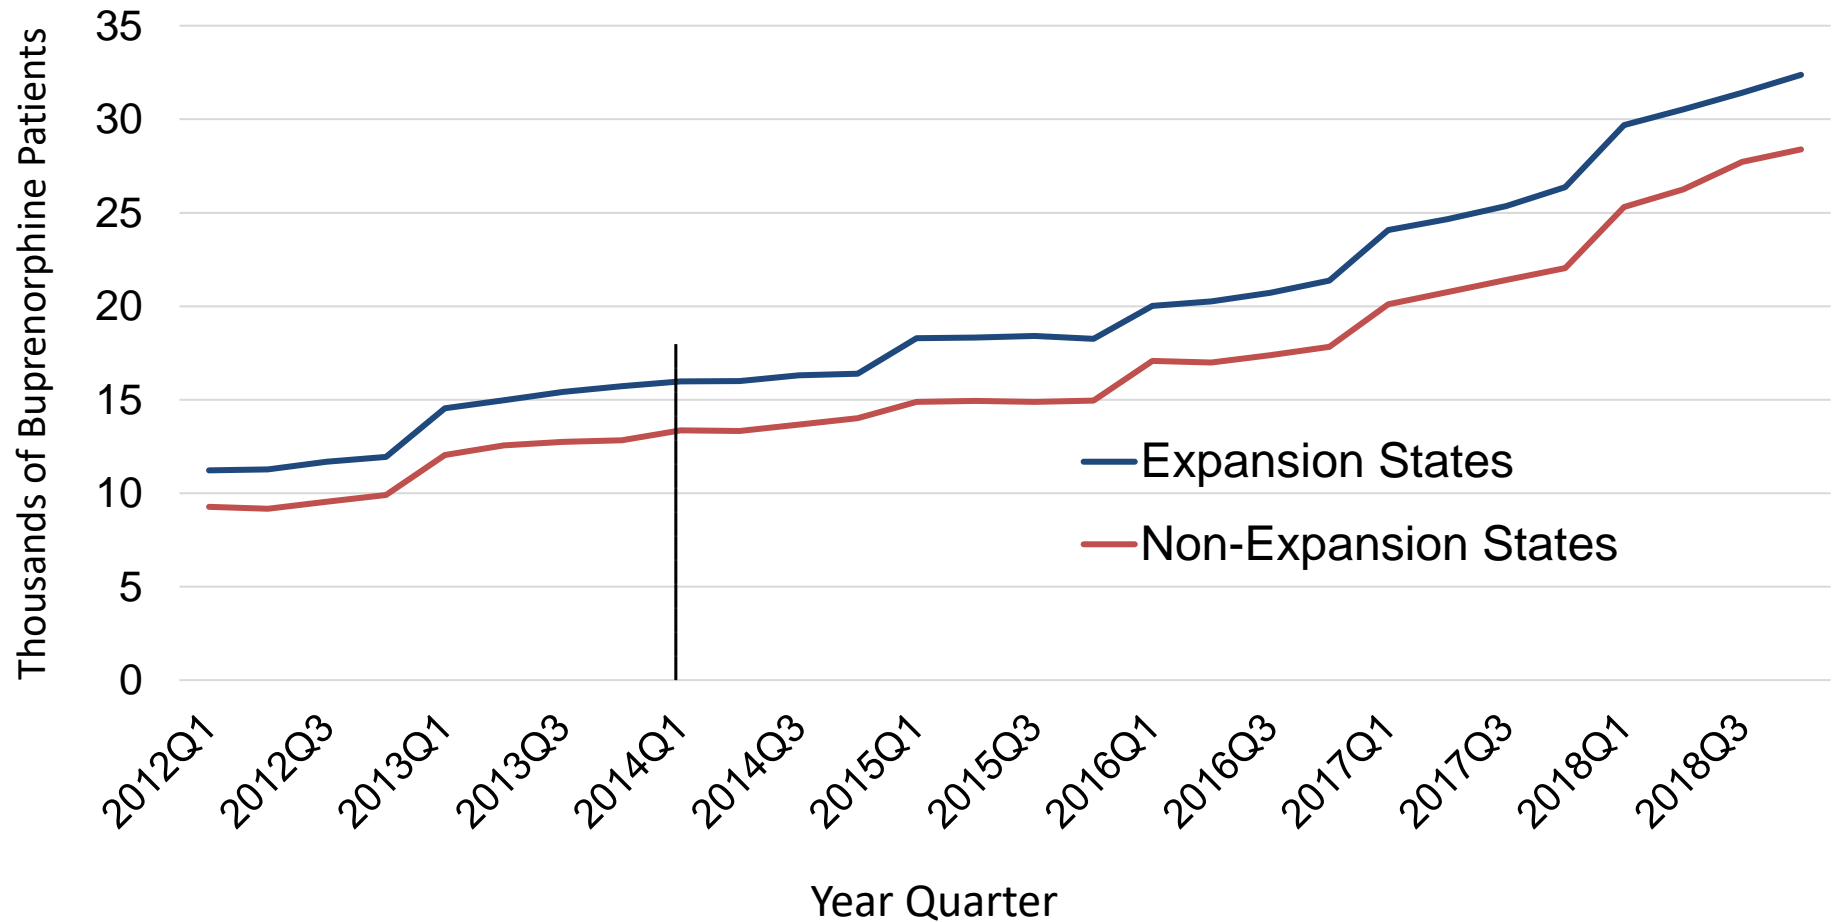

Data source: 2012-2018 IQVIA LRx data. \*Excludes Medicaid insured patients.
